# Supplementary material
Source: Research Square preprint supplement (doi:10.21203/rs.3.rs-10006164/v1)
Supplement: Supplementary file 1 [file 14f7794ecab21ce60bd692e0.docx]

**Table 1A. Baseline characteristics of included studies.**

| **Study, y ⁞** | **Country** | **CKD stages included** | **Patients with CKD, n** | **Age of overall population** | **Males on overall population, n (%)☨** | **ECOG of overall population, n (%)☨** | **Cancer type** | **ICI type, n (%)☨** | **Prior nephrectomy, n (%)☨** | **Treatment line, n (%)☨** | **Follow-up (months)** |
| --- | --- | --- | --- | --- | --- | --- | --- | --- | --- | --- | --- |
| **Abdelrahim 2021** | United States | G3/5 | 249 | 63a | 1098 (65.9) | NA | Metastatic or adjuvant melanoma | Atezolizumab: 22 (1.32)  Ipilimumab: 474 (28.49)  Ipilimumab/nivolumab: 159 (9.56)  Ipilimumab/pembrolizumab: 242 (14.54)  Nivolumab: 331 (19.89)  Pembrolizumab: 436 (26.20) | NA | NA | 9 |
| **Abraham 2021** | India | NA | 16 | 64a | 130 (86.7) | 0‐1: 98 (65.3)  2: 46 (30.7)  3: 6 (4.0) | Hematologic malignancies (thoracic, H&N, GU) | Nivolumab: 119 (79.4%) | NA | 1ª) 44 (29.4)  2ª) 76 (50.6) | 14.3 |
| **Ishihara 2024 (IOIO)** | Japan | G3a  G3b | G4/5 | 67 | 50p > 65y | 70 (71) | NA | Renal cell carcinoma | Nivolumab + ipilimumab:  98 (100) | w/ CKD: 50 (74)  w/o CKD: 16 (52) | 1ª) 98 (100) | 19.1 |
| **Ishihara 2024 (IOTKI)** | Japan | G3a  G3b/4/5 | 51 | 43p > 65y | 51 (73) | NA | Renal cell carcinoma | Pembrolizumab + axitinib: 23 (33)  Avelumab + axitinib: 11 (15)  Cabozantinib + nivolumab: 20 (28)  Lenvatinib + pembrolizumab: 15 (21) | w/ CKD: 41 (80)  w/o CKD: 7 (39) | 1ª) 69 (100) | 11.8 |
| **Kerr**  **2019** | United States | G3 | G4 | 15 | 69a | 133 (65) | NA | Solid  or hematologic malignancies | Ipilimumab: 27 (13)  Nivolumab: 46 (22)  Pembrolizumab: 84 (41)  Sequential single agent CPI: 28 (14)  Combined IPI + NIVO: 21 (10) | NA | 1ª) 201 (97) | 3-12 |
| **Kesireddy 2023** | United States | G3 G4 | G5 | 90 | 71.5a | 55 (61) | 0: 7 (8)  1: 53 (59)  2: 27 (30)  3: 3 (3) | Breast, lung, GI, GU, H&N, liver and skin | PD‐1 inhibitors: 65 (72)  TKI w/ PD‐L1 inhibitor or PD‐1 inhibitor: 3 (3.3) | NA | NA | 72 |
| **Koks**  **2021** | Netherlands | G2  G3/5 | 68 | 64a | 420 (62) | NA | Melanoma, gynecologic, NSCLC, urinary tract, and other cancers | Nivolumab: 202 (29.9)  Ipilimumab: 45 (6.7)  Pembrolizumab: 236 (34.9)  Nivolumab + Ipilimumab: 132 (19.5)  Other: 61 (9.0) | NA | NA | 91 |
| **Kuo**  **2020** | China | Any CKD | 11 | 66a | 76 (58.9) | 0-1: 102 (79.1)  ≧2: 24 (18.6) | Tumors located in UC and UTUC | Anti-PD-1: 84 (65.1)  Anti-PD-L1: 45 (34.9) | NA | 1ª) 97 (75.2)  2ª) 19 (14.7)  3ª) 13 (10.1) | 43 |
| **Lumlertgul 2023** | United Kingdom | G3a / 3b / 4 | 214 | 63 (53, 72) | 623 (60%) | NA | Melanoma  Lung  Urological  Haematological | Anti-PD1 768 (74%)  Anti-PDL1 123 (12%)  Anti-CTLA-4 61 (5.9%) | NA | NA | NA |
| **Sengul**  **2024** | Turkey | G3a  G3b/5 | 26 | 57a | 65 (68.4) | 0: 30 (31.6)  1: 63 (66.3)  2: 2 (2.1) | Renal cell carcinoma | Nivolumab: 95 | w/ CKD:  Partial: 1 (3.8) Radical: 24 (92.3)  w/o CKD:  Partial: 6 (8.7)  Radical: 53 (76.8) | 1ª) 1 (1.1)  2ª) 41 (43.2)  3ª) 33 (34.7)  4ª) 11 (11.6)  5ª) 9 (9.5) | 16.2 ± 1.6 |
| **Seydel 2021** | Germany | < G2 but no ESRD | 49 | 68.52 ± 10.21 | 36 (73.5) | NA | Advanced Renal or Urothelial Cell Carcinoma | Pembrolizumab 7 (14.3)  Nivolumab 32 (65.3)  Atezolizumab 4 (8.2)  Nivolumab + ipilimumab 6 (12.2) | w/ CKD Nephrectomy 37 (75.5) | 1st 7 (21.9)  2nd 19 (59.4)  3rd 3 (9.4)  4th 2 (6.3) | NA |
| **Stein**  **2021** | France | G3 | G4 | 23 | 68a | 132 (55) | NA | Melanoma | Nivolumab: 121(51)  Pembrolizumab: 118 (49) | NA | NA | ≈ 12 |
| **Tachibana**  **2019** | Japan | Any CKD | 7 | 67a | 7 (100) | NA | Renal cell carcinoma | Nivolumab: 7 (100) | 6 (85.7) | 2ª) 3 (42.9) 3ª) 1 (14.3)  4ª) 2 (28.6)  5ª) 1 (14.3) | 60 |
| **Tiu**  **2023** | United States | G3a | G3b | G4/5 | 1247 | 72.8 ± 9.9 | 728 (58.3) | NA | GU, thoracic, gastrointestinal, gynecologic, breast cancers and melanoma | NA | 167 (13.3) | NA | ≈101 |
| **Wang**  **2022** | United States | NA | 777 | 67.8 (10.8) | 553 (71.2) | 0-2: 133 (89.9)  3-4: 15 (10.1) | Lung, renal, bladder, H&N cancers, or melanoma | Pembrolizumab: 381 (49.0) Nivolumab: 411 (52.9)  Ipilimumab plus nivolumab: 126 (16.2) | NA | NA | ≈ 50 |

CKD:Chronic kidney disease; ECOG: Eastern Cooperative Oncology Group; GI: Gastrointestinal; GU: Genitourinary; H&N: Head and Neck; ICI: Immune Checkpoint Inhibitors; TKI: tyrosine kinase inhibitor; NSCLC: non-small-cell lung carcinoma; P: patients

a median ☨ number ⁞ year
